# Supplementary material
Source: Springer Nature journal article supplement (https://www.springermedizin.de/resource/supplementary/13046_2010_348_MOESM6_ESM.pdf/9661828)

Funnel plot with pseudo 95% confidence limits

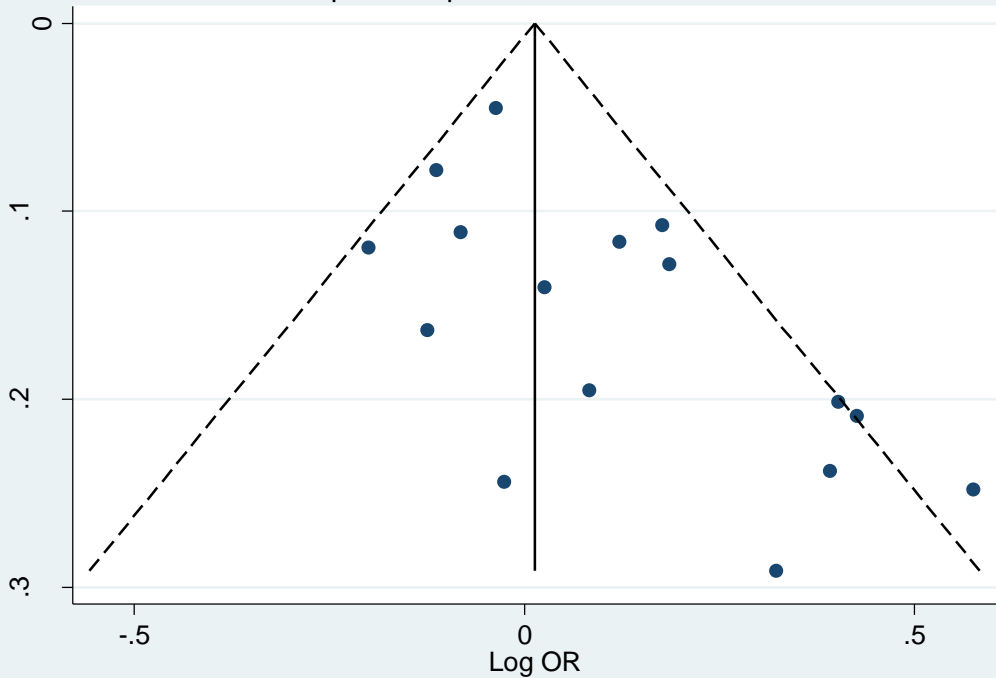

Supplement: MOESM6 [file 9661828]
